# Supplementary material for: Variations of BRAF mutant allele percentage in melanomas
Source: Springer Nature journal article supplement (doi:10.1186/s12885-015-1515-3), 2015-07-03

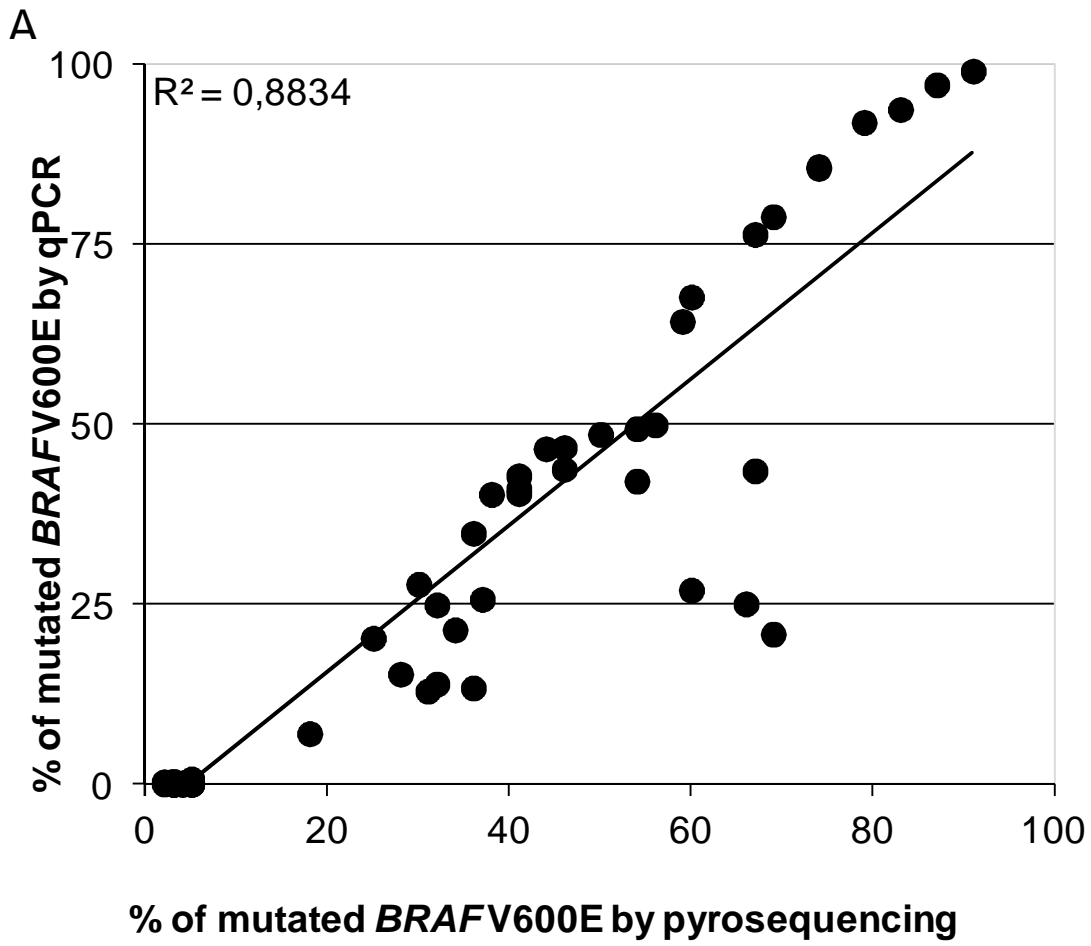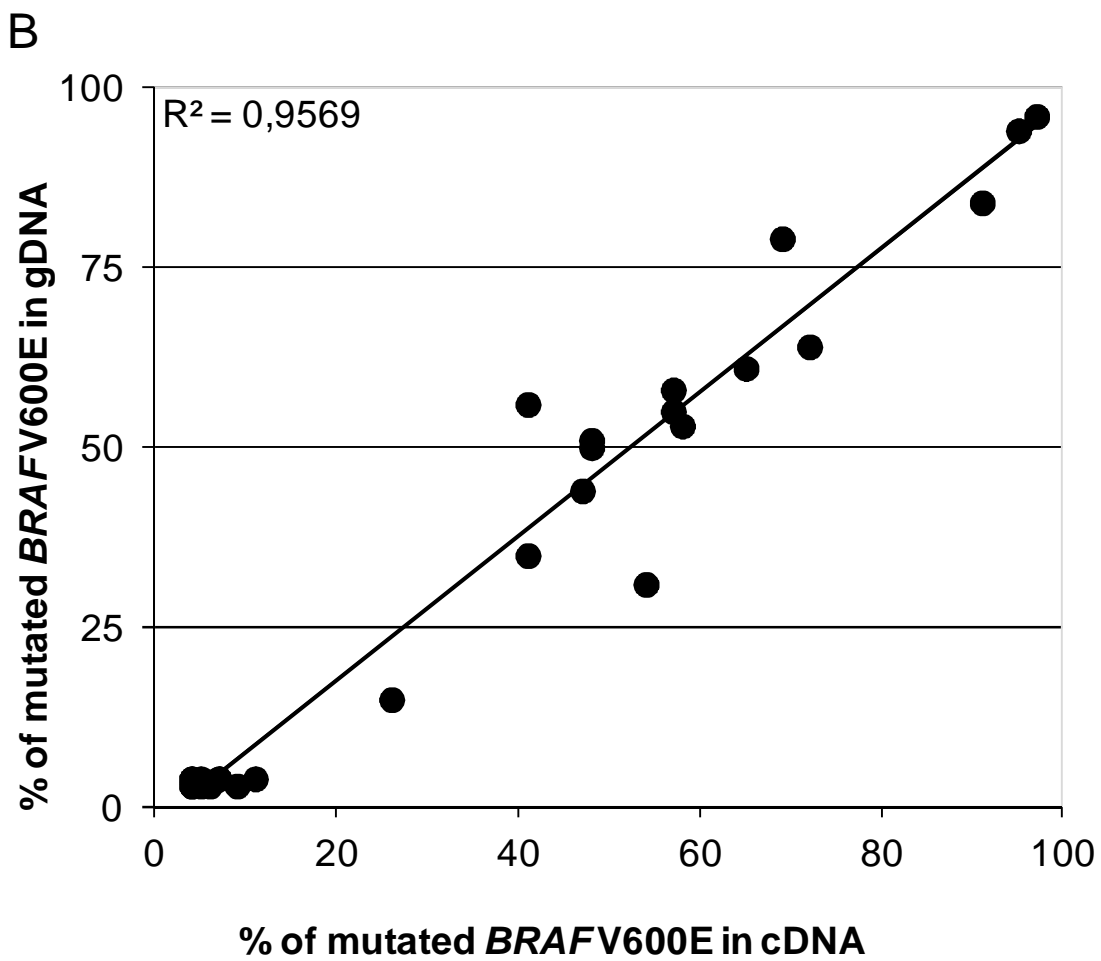

Supplement: MOESM2 [file 9744812]
