# Supplementary material for: Variations of BRAF mutant allele percentage in melanomas
Source: Springer Nature journal article supplement (doi:10.1186/s12885-015-1515-3), 2015-07-03
Supplement: MOESM3 [file 9744812]

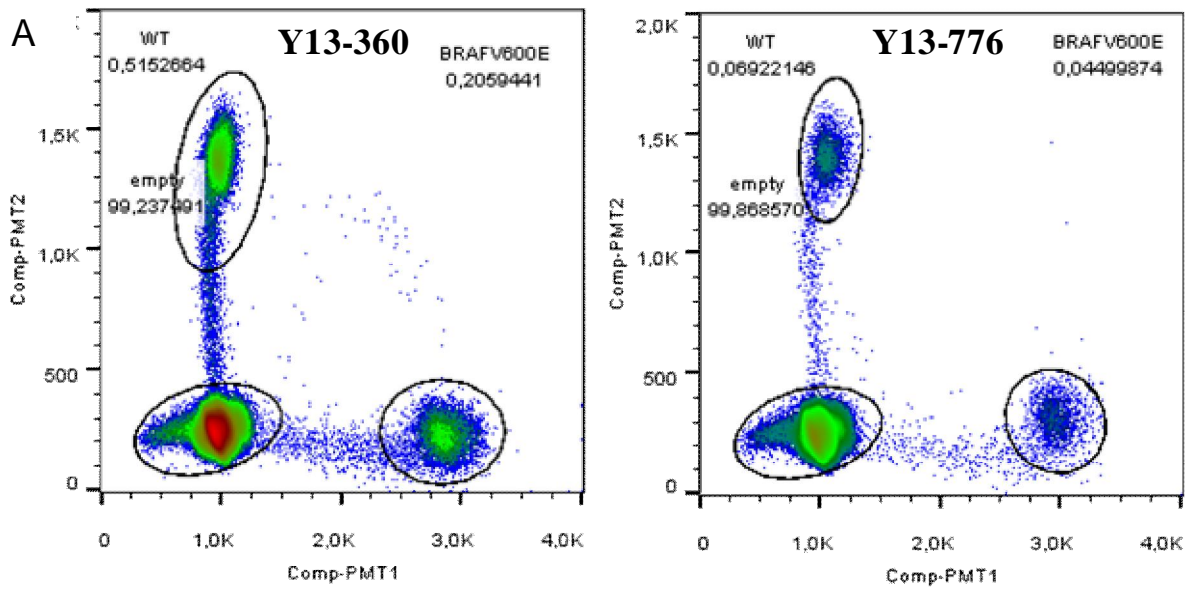

**B**

| Samples | No. of WT/V600E genomes by dPCR | % of mutated BRAF by |                |
|---------|---------------------------------|----------------------|----------------|
|         |                                 | dPCR                 | pyrosequencing |
| Y13-468 | 5561/1219                       | 18.0                 | 21.5           |
| Y13-360 | 21468/8477                      | 28.3                 | 30.5           |
| Y13-776 | 2892/1872                       | 39.3                 | 42             |
| Y13-992 | 3701/3790                       | 50.6                 | 49.5           |
| Y13-332 | 90/133                          | 59.6                 | 57.5           |
| Y13-158 | 16486/28857                     | 63.6                 | 65             |
| Y13-443 | 1134/3306                       | 74.4                 | 73             |
