# Supplementary material for: Variations of BRAF mutant allele percentage in melanomas
Source: Springer Nature journal article supplement (doi:10.1186/s12885-015-1515-3), 2015-07-03
Supplement: MOESM6 [file 9744812]

## ***BRAF* WT group No=59**

| <b>Samples</b> | <b>FISH results</b> | <b>BRAF-M%</b> |
|----------------|---------------------|----------------|
| Y10.1644       | 2                   | 4              |
| Y10.1645       | 2                   | 4              |
| Y10.1759       | 2                   | 3.3            |
| Y10.1766       | 2                   | 4              |
| Y10.1768       | 2                   | 6              |
| Y10.1771       | 2                   | 7              |
| Y10.1779       | 2                   | 3              |
| Y10.1788       | 2                   | 3              |
| Y10.1802       | 2                   | 3              |
| Y10.1836       | 2                   | 3              |
| Y10.880        | 2                   | 3              |
| Y11.190        | 2                   | 3              |
| Y11.991        | 2                   | 2              |
| Y12.138        | 2                   | 5.5            |
| Y12.198        | 2                   | 4.5            |
| Y12.205        | 2                   | 2.5            |
| Y12.300        | 2                   | 4              |
| Y12.514        | 2                   | 4.5            |
| Y12.578        | 2                   | 5              |
| Y12.658        | 2                   | 2              |
| Y10.1471       | 3                   | 3              |
| Y10.1526       | 3                   | 3              |
| Y10.1589       | 3                   | 3.5            |
| Y10.1646       | 3                   | 3              |
| Y10.1647       | 3                   | 3              |
| Y10.1772       | 3                   | 5              |
| Y10.1777       | 3                   | 5              |
| Y10.1778       | 3                   | 3.5            |
| Y10.1780       | 3                   | 4              |
| Y10.1787       | 3                   | 4              |
| Y10.1806       | 3                   | 2.5            |
| Y10.2113       | 3                   | 3              |
| Y11.189        | 3                   | 3              |
| Y11.5          | 3                   | 3              |
| Y11.7          | 3                   | 3              |
| Y11.826        | 3                   | 6              |
| Y11.996        | 3                   | 3              |
| Y12.255        | 3                   | 6              |
| Y12.278        | 3                   | 5              |
| Y12.316        | 3                   | 3              |
| Y12.36         | 3                   | 4              |
| Y12.461        | 3                   | 5              |
| Y12.616        | 3                   | 3.5            |

### **FISH**

2 = disomy of chromosome 7  
3 = disomy of chromosome 7 but rare cells with chromosome 7 polysomy  
4 = polysomy of chromosome 7  
5 = BRAF amplification or gain  
6= monosomy of chromosome 7

| <b>Samples</b> | <b>FISH results</b> | <b>BRAF-M%</b> |
|----------------|---------------------|----------------|
| Y12.627        | 3                   | 4              |
| Y12.878        | 3                   | 10             |
| Y12.882        | 3                   | 5.5            |
| Y12.39         | 5                   | 3.5            |
| Y10.1822       | 5                   | 5              |
| Y10.1470       | 6                   | 2              |
| Y10.1752       | 6                   | 4              |
| Y13.50         | 6                   | 5.5            |
| Y12.1041       | 4A                  | 2              |
| Y10.1898       | 4A                  | 3              |
| Y12.636        | 4A                  | 3.5            |
| Y12.657        | 4A                  | 4.5            |
| Y10.1760       | 4A                  | 10             |
| Y12.661        | 4B                  | 3.5            |
| Y10.1476       | 4B                  | 4              |
| Y10.1791       | 4B                  | 4.5            |

## ***BRAF* V600E Heterozygous group No=34**

| <b>Samples</b> | <b>FISH results</b> | <b>BRAF-M%</b> |
|----------------|---------------------|----------------|
| Y10.1764       | 2                   | 41             |
| Y12.435        | 2                   | 45.5           |
| Y12.943        | 2                   | 41             |
| Y10.1473       | 3                   | 39             |
| Y10.1651       | 3                   | 36.5           |
| Y10.1751       | 3                   | 35             |
| Y10.1753       | 3                   | 54             |
| Y10.1767       | 3                   | 41             |
| Y10.1810       | 3                   | 38.5           |
| Y10.1830       | 3                   | 40.5           |
| Y10.2001       | 3                   | 35             |
| Y11.200        | 3                   | 47             |
| Y11.6          | 3                   | 32             |
| Y12.1018       | 3                   | 46             |
| Y12.301        | 3                   | 34.3           |
| Y12.374        | 3                   | 46             |
| Y12.409        | 3                   | 30.25          |
| Y12.610        | 3                   | 46             |
| Y12.653        | 3                   | 35.5           |
| Y12.303        | 5                   | 50             |
| Y12.377        | 5                   | 54             |
| Y12.667        | 5                   | 30.5           |
| Y12.717        | 4A                  | 36.5           |
| Y12.1001       | 4A                  | 51.5           |
| Y11.13         | 4A                  | 48             |
| Y10.2002       | 4A                  | 35             |
| Y10.1818       | 4A                  | 59.5           |
| Y10.1469       | 4A                  | 42             |
| Y10.1525       | 4B                  | 51.5           |
| Y10.1650       | 4B                  | 56.5           |
| Y10.1762       | 4B                  | 38             |
| Y10.1794       | 4B                  | 48             |
| Y12.1006       | 4B                  | 48             |
| Y12.257        | 4B                  | 58.5           |

## ***BRAF* V600E Non-Heterozygous group No=22**

| <b>Samples</b> | <b>FISH results</b> | <b>BRAF-M%</b> |
|----------------|---------------------|----------------|
| Y10.1668       | 3                   | 79.5           |
| Y10.1776       | 3                   | 19             |
| Y10.1835       | 3                   | 68             |
| Y11.183        | 3                   | 17             |
| Y11.9          | 3                   | 74             |
| Y12.240        | 3                   | 68.5           |
| Y12.260        | 3                   | 74.5           |
| Y12.337        | 3                   | 25.5           |
| Y11.25         | 5                   | 83             |
| Y10.1652       | 6                   | 26.5           |
| Y12.487        | 4A                  | 90             |
| Y11.919        | 4A                  | 80             |
| Y10.2082       | 4A                  | 88             |
| Y10.1819       | 4A                  | 61             |
| Y10.1733       | 4A                  | 87             |
| Y10.1127       | 4A                  | 61             |
| Y10.1761       | 4B                  | 25.5           |
| Y10.1790       | 4B                  | 67             |
| Y10.1808       | 4B                  | 28.5           |
| Y10.1811       | 4B                  | 61.5           |
| Y12.434        | 4B                  | 85             |
| Y13.855        | 4B                  | 62.5           |

## **Other *BRAF* V600 mutations group No=10**

| <b>Samples</b> | <b>FISH results</b> | <b>Type of Mutation</b> |
|----------------|---------------------|-------------------------|
| Y10.848        | 3                   | p.V600K                 |
| Y11.701        | 3                   | p.K601E                 |
| Y12.743        | 3                   | p.V600K                 |
| Y12.781        | 3                   | p.V600K                 |
| Y12.302        | 5                   | p.V600K                 |
| Y10.1472       | 4A                  | p.V600-K601 delins E    |
| Y10.1997       | 4A                  | p.V600K                 |
| Y10.1831       | 4B                  | p.V600K                 |
| Y11.515        | 4B                  | p.K601E                 |
| Y12.230        | 4B                  | p.V600K                 |
